# Supplementary material for: Development of Bioactive Cellulose Films from Drynaria quercifolia Rhizome: A Sustainable Approach to Advanced Natural Materials
Source: Research Square preprint supplement (doi:10.21203/rs.3.rs-7434052/v1), 2025-10-28
Supplement: Supplementary file 1 [file 6b9ce5d566c41064ffae0437.docx]

Online Resource Table 1. Phytochemical Analysis Procedure [19], [20], [21], [22]

| **PHYTOCHEMICAL** | **NAME OF THE TEST** | **PROCEDURE** |
| --- | --- | --- |
| Alkaloid | Mayers Test | To the few mL of the extract, two drops of Mayer’s reagent are added along the sides of the test tube. The appearance of a creamy precipitate indicates the presence of alkaloids. |
| Flavonoids | Lead Acetate Test | 3 ml of 10% lead acetate solution is added to the extract. A bulky white precipitate indicates the presence of phenolic compounds. |
| Glycosides | Keller- Killani Test | The extract was mixed with 2ml of glacial acetic acid, and a drop of ferric chloride solution was added, followed by 1ml of concentrated. H2SO4. A brown ring in the interface indicates the presence of cardiac glycosides |
| Carbohydrates | Molisch Test | To the extract, two drops of an alcoholic solution of α-naphthol are added. The  mixture is shaken well, and a few drops of concentrated sulphuric acid are added slowly along the sides of the test tube. A violet ring indicates the presence of carbohydrates. |
| Protein | Ninhydrin Test | The extract adds two drops of ninhydrin solution (10 mg of ninhydrin in 200 ml of acetone). The appearance of purple colour indicates the presence of amino acids. |
| Saponins | Foam Test | The extract is shaken for 5 to 10 minutes. A layer of foam indicates the presence of saponins. |
| Terpenoids | Salkowski’s Test | To the extract,1ml of chloroform and 1.5 mL of concentrated H2SO4 are added along the sides of the tube. The reddish brown colour in the interface is considered positive for the presence of terpenoids. |
| Steroids | Liebermann-Buchard Test | The extract is dissolved in 2 mL of acetic anhydride. To this, 1 or 2 drops of concentrated sulphuric acid are added slowly along the sides of the test tube. An array of colour changes shows the presence of phytosterols. |
| Quinones | Sulphuric acid Test | 1mL of concentrated sulphuric acid was added to the extract. The appearance of red indicates the presence of quinones. |
| Phenol | Liebermann’s Test | To 1mL of the extract, sodium nitrate crystals were added and heated gently. The solution was cooled, and 1mL of concentrated sulphuric acid was added. The appearance of blue colour indicates the presence of phenolic compounds. |
